# Supplementary material for: Unveiling organic–inorganic hybrids as a cathode material for high performance lithium-ion capacitors
Source: Royal Society of Chemistry journal article supplement (doi:10.1039/c2ta00553k), 2012-10-18
Supplement: c2ta00553k.pdf [file c2ta00553k.pdf]

### Supporting Information

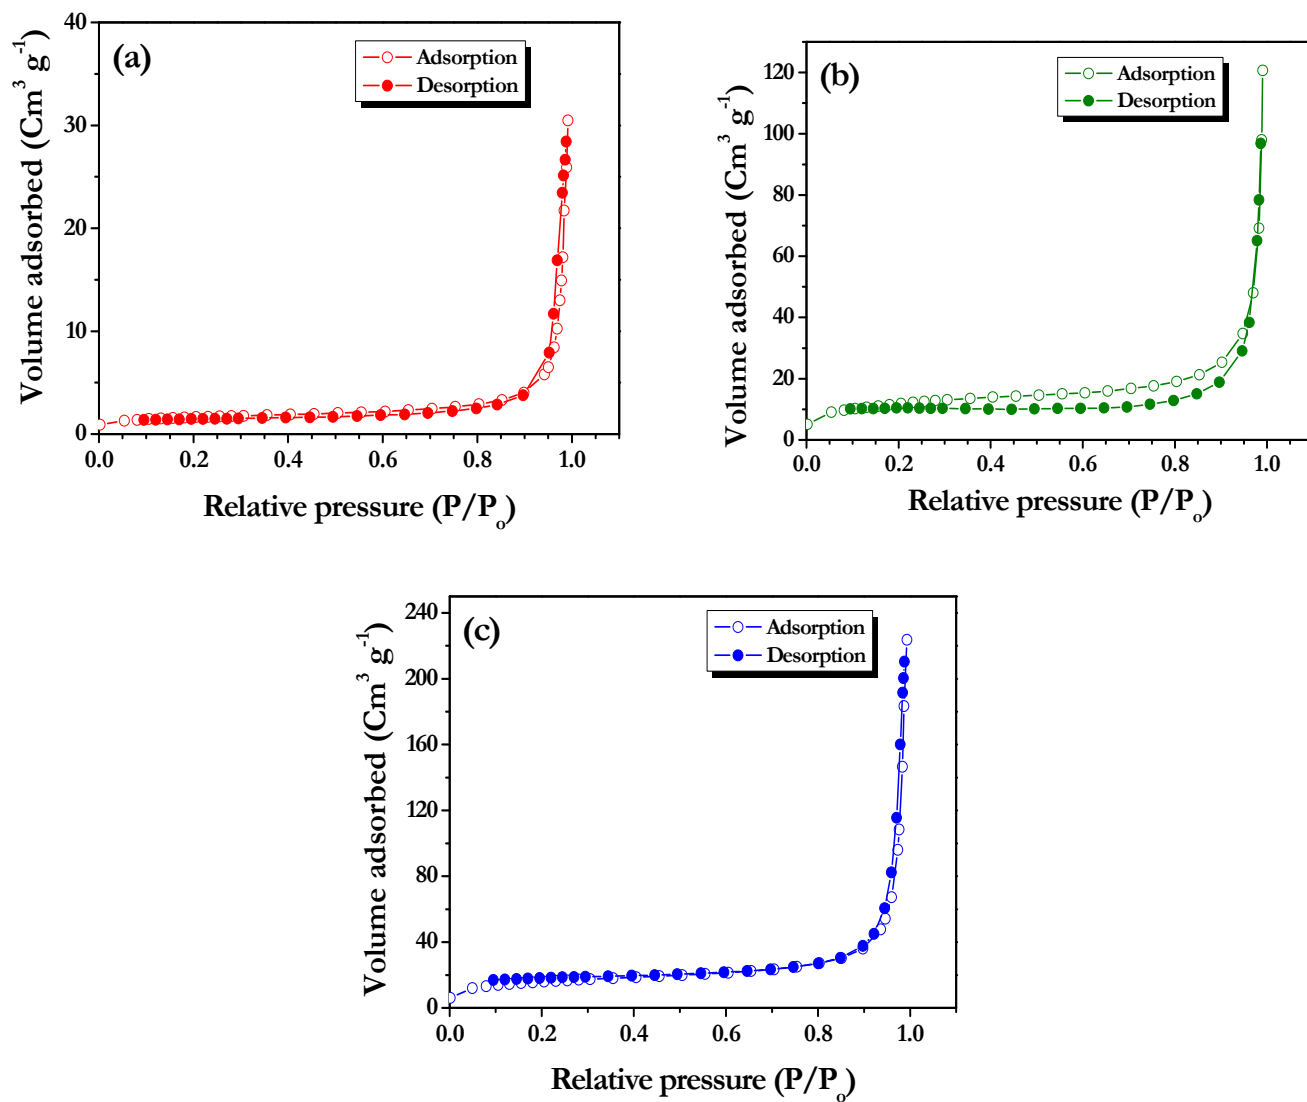

**Figure S1.** N<sub>2</sub> adsorption/desorption isotherms (a) Li(Mn<sub>1/3</sub>Ni<sub>1/3</sub>Fe<sub>1/3</sub>)O<sub>2</sub> (b)

Li(Mn<sub>1/3</sub>Ni<sub>1/3</sub>Fe<sub>1/3</sub>)O<sub>2</sub>-PPy and (c) Li(Mn<sub>1/3</sub>Ni<sub>1/3</sub>Fe<sub>1/3</sub>)O<sub>2</sub>-PANI composite materials.

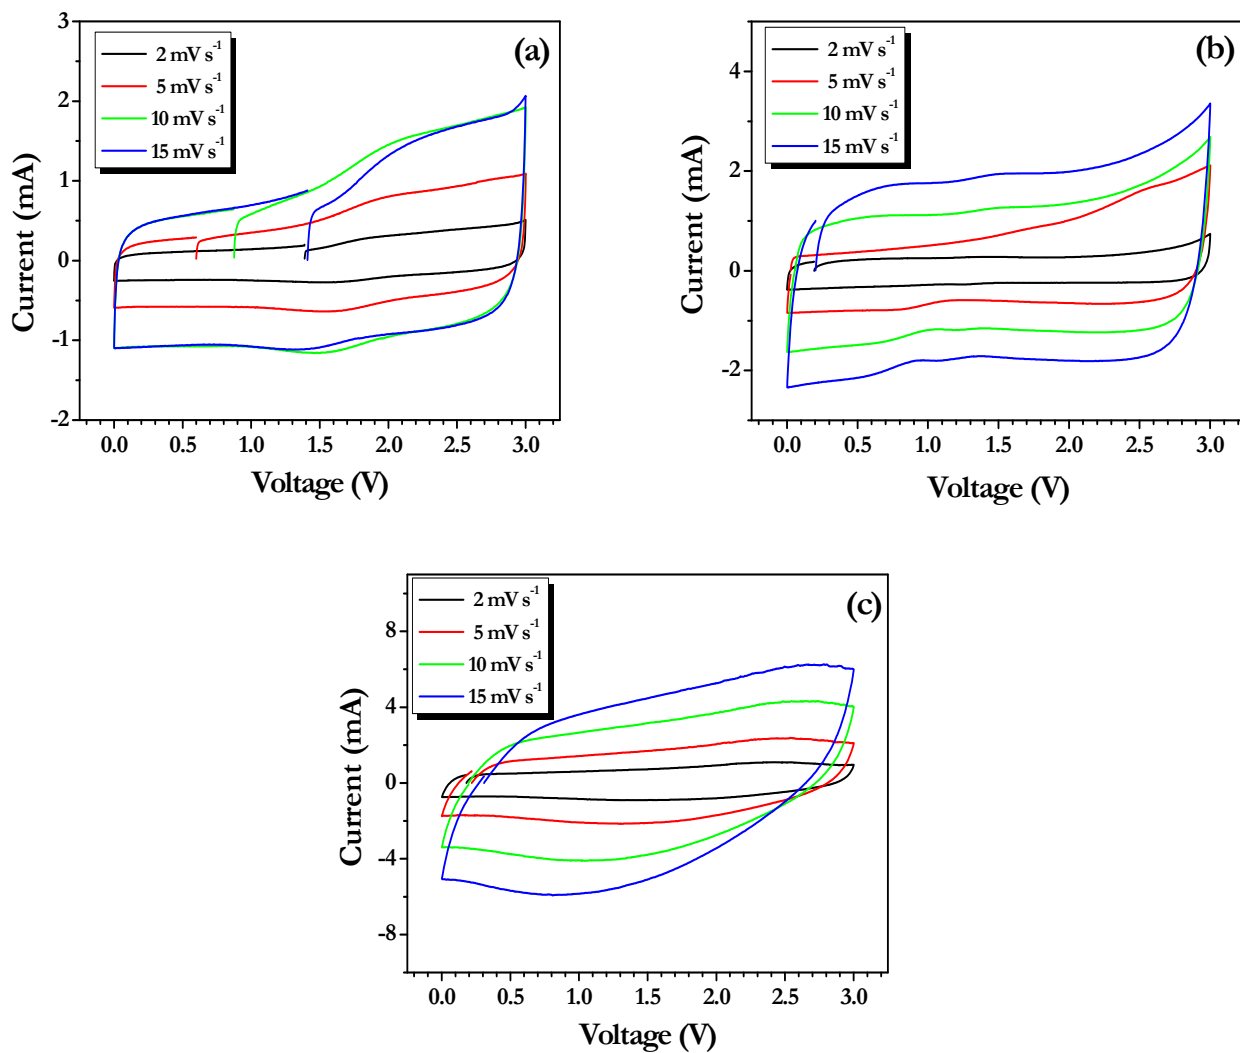

**Figure S2.** CV curves of (a)  $\text{Li}(\text{Mn}_{1/3}\text{Ni}_{1/3}\text{Fe}_{1/3})\text{O}_2/\text{AC}$  (b)  $\text{Li}(\text{Mn}_{1/3}\text{Ni}_{1/3}\text{Fe}_{1/3})\text{O}_2\text{-PPy}/\text{AC}$  and (c)  $\text{Li}(\text{Mn}_{1/3}\text{Ni}_{1/3}\text{Fe}_{1/3})\text{O}_2\text{-PANI}/\text{AC}$  cells recorded at different current rates between 0-3 V in the presence of 1 M  $\text{LiPF}_6$  in EC:DMC (1:1 v/v.).

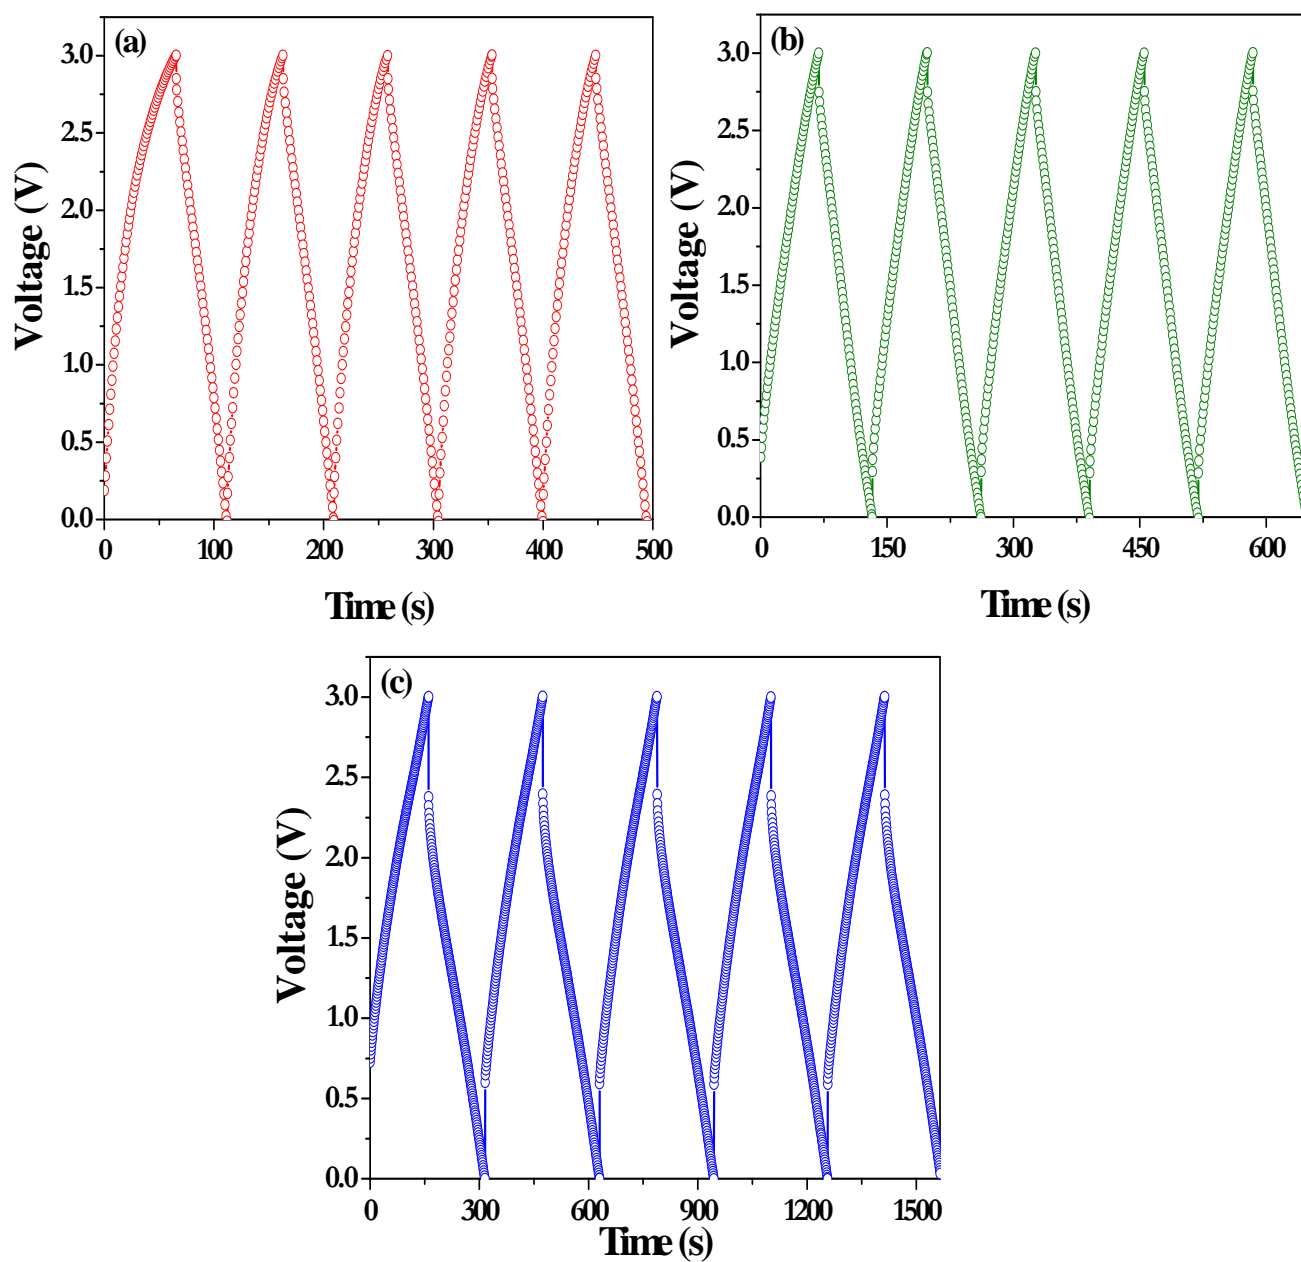

**Figure S3.** Charge discharge curves of (a)  $\text{Li}(\text{Mn}_{1/3}\text{Ni}_{1/3}\text{Fe}_{1/3})\text{O}_2/\text{AC}$  (b)  $\text{Li}(\text{Mn}_{1/3}\text{Ni}_{1/3}\text{Fe}_{1/3})\text{O}_2\text{-PPy}/\text{AC}$  and (c)  $\text{Li}(\text{Mn}_{1/3}\text{Ni}_{1/3}\text{Fe}_{1/3})\text{O}_2\text{-PANI}/\text{AC}$  cells recorded at  $0.72 \text{ A g}^{-1}$  current density between 0-3 V in 1 M  $\text{LiPF}_6/\text{EC}:\text{DMC}$  (1:1 v/v.) electrolyte.

**Table S1.** Comparison of specific power ( $S_{PD}$ ,  $W\ kg^{-1}$ ) and specific energy density ( $S_{ED}$ ,  $Wh\ kg^{-1}$ ) of various non-aqueous Li-ion hybrid supercapacitors with Li-intercalating materials as electrodes at given current density.

| Systems                                                                                 | $S_{PD}$ ( $W\ kg^{-1}$ ) | $S_{ED}$ ( $Wh\ kg^{-1}$ ) | Reference           |
|-----------------------------------------------------------------------------------------|---------------------------|----------------------------|---------------------|
| <b>PANI-Li(Mn<sub>1/3</sub>Ni<sub>1/3</sub>Fe<sub>1/3</sub>)O<sub>2</sub>/AC</b>        | <b>1000</b>               | <b>~49</b>                 | <b>Present work</b> |
| LiMn <sub>2</sub> O <sub>4</sub> /AC                                                    | 125                       | 35                         | [1]                 |
| LiTi <sub>2</sub> (PO <sub>4</sub> ) <sub>3</sub> /AC                                   | 180                       | 14                         | [2]                 |
| Li <sub>4</sub> Ti <sub>5</sub> O <sub>12</sub> /poly(methyl)thiophene                  | 30                        | 10                         | [3]                 |
| LiCoPO <sub>4</sub> /CNF                                                                | 192                       | 11                         | [4]                 |
| LiMn <sub>2</sub> O <sub>4</sub> /MnO <sub>2</sub> -CNT                                 | 600                       | 42                         | [5]                 |
| (LiMn <sub>2</sub> O <sub>4</sub> + AC)/Li <sub>4</sub> Ti <sub>5</sub> O <sub>12</sub> | ~200                      | 16                         | [6]                 |
| LiTi <sub>2</sub> (PO <sub>4</sub> ) <sub>3</sub> /MnO <sub>2</sub>                     | 200                       | 43                         | [7]                 |
| Li <sub>2</sub> MnSiO <sub>4</sub> /AC                                                  | 900                       | 40                         | [8]                 |
| Li <sub>2</sub> FeSiO <sub>4</sub> /AC                                                  | 1000                      | 33                         | [9]                 |
| LiCrTiO <sub>4</sub> /AC                                                                | 800                       | 23                         | [10]                |
| V <sub>2</sub> O <sub>5</sub> /CNT                                                      | 45                        | 18                         | [11]                |

## References

1. Y. G. Wang and Y. Y. Xia, *Electrochem. Commun.* 2005, **7**, 1138-1142.
2. V. Aravindan, W. Chuiling, M. V. Reddy, G.V.S. Rao, B. V. R. Chowdari and S. Madhavi, *Physical Chemistry Chemical Physics*, 2012, **14**, 5808-5814.
3. A. D. Pasquier, A. Laforgue and P. Simon, *J. Power Sources* 2004, **125**, 95–102.
4. R. Vasanthi, D. Kalpana and N. G. Renganathan, *J Solid State Electrochem.*, 2008, **12**, 961–

969.

5. S. B. Ma, K. W. Nam, S. B. Yoon, X. Q. Yang, K. Y. Ahn, K. H. Oh and K. B. Kim, *Electrochem. Comm.* 2007, **9**, 2807–2811.
6. X. Hua, Z. Denga, J. Suo and Z. Pan, *J. Power Sources* 2009, **187**, 635–639.
7. J. Y. Luo, J. L. Liu, P. He and Y. Y. Xia, *Electrochimica Acta* 2008, **53**, 8128–8133.
8. K. Karthikeyan, V. Aravindan, S. B. Lee, I. C. Jang, H. H. Lim, G. J. Park, M. Yoshio and Y. S. Lee, *J. Power Sources* 2010, **195**, 3761-3764
9. K. Karthikeyan, V. Aravindan, S. B. Lee, I. C. Jang, H. H. Lim, G. J. Park, M. Yoshio and Y. S. Lee, *J. Alloys Compds.*, 2010, **504**, 224-227.
10. V. Aravindan, W. Chuilin and S. Madhavi, *J. Mater. Chem.* 2012, **22**, 16026-16031
11. V. Aravindan, Y.L. Cheah, G. Wee, B.V.R. Chowdari and S. Madhavi, *ChemPlusChem* 2012, **77**, 570-575
